# Supplementary material for: Assessment of image co-registration accuracy for frameless gamma knife surgery
Source: PubMed Central journal article supplement (PMC5834193; doi:10.1371/journal.pone.0193809), 2018-03-02
Supplement: pone.0193809.s001.pdf [file pone.0193809.s001.pdf]

S1 Table. Frequency Counts for CBCT-CBCT co-registration

| Before Coregistration |          |          |          |              |        |
|-----------------------|----------|----------|----------|--------------|--------|
| Deviation             | Counts_X | Counts_Y | Counts_Z | 3D_deviation | Counts |
| -0.275                | 0        | 0        | 0        | 0.025        | 4      |
| -0.225                | 0        | 1        | 0        | 0.075        | 18     |
| -0.175                | 4        | 2        | 1        | 0.125        | 18     |
| -0.125                | 7        | 5        | 2        | 0.175        | 16     |
| -0.075                | 11       | 13       | 7        | 0.225        | 2      |
| -0.025                | 9        | 12       | 12       | 0.275        | 1      |
| 0.025                 | 19       | 13       | 25       | 0.325        | 1      |
| 0.075                 | 3        | 7        | 6        | 0.375        | 0      |
| 0.125                 | 5        | 7        | 7        | 0.425        | 0      |
| 0.175                 | 2        | 0        | 0        | 0.475        | 0      |
| 0.225                 | 0        | 0        | 0        | 0.525        | 0      |
| 0.275                 | 0        | 0        | 0        |              |        |
| 0.325                 | 0        | 0        | 0        |              |        |
| 0.375                 | 0        | 0        | 0        |              |        |

| Co-registration without movement |          |          |          |              |        |
|----------------------------------|----------|----------|----------|--------------|--------|
| Deviation                        | Counts_X | Counts_Y | Counts_Z | 3D_deviation | Counts |
| -0.275                           | 0        | 0        | 0        | 0.025        | 1      |
| -0.225                           | 0        | 0        | 2        | 0.075        | 14     |
| -0.175                           | 0        | 0        | 5        | 0.125        | 22     |
| -0.125                           | 8        | 3        | 3        | 0.175        | 20     |
| -0.075                           | 9        | 14       | 2        | 0.225        | 12     |
| -0.025                           | 16       | 16       | 7        | 0.275        | 4      |
| 0.025                            | 11       | 18       | 16       | 0.325        | 2      |
| 0.075                            | 18       | 7        | 18       | 0.375        | 0      |
| 0.125                            | 10       | 11       | 9        | 0.425        | 0      |
| 0.175                            | 2        | 6        | 9        | 0.475        | 0      |
| 0.225                            | 0        | 0        | 3        | 0.525        | 0      |
| 0.275                            | 0        | 0        | 0        |              |        |
| 0.325                            | 1        | 0        | 1        |              |        |
| 0.375                            | 0        | 0        | 0        |              |        |

| Co-registration after rotation only |          |          |          |              |        |
|-------------------------------------|----------|----------|----------|--------------|--------|
| Deviation                           | Counts_X | Counts_Y | Counts_Z | 3D_deviation | Counts |
| -0.275                              | 0        | 1        | 0        | 0.05         | 3      |
| -0.225                              | 3        | 2        | 1        | 0.1          | 20     |
| -0.175                              | 3        | 7        | 2        | 0.15         | 52     |
| -0.125                              | 7        | 11       | 22       | 0.2          | 35     |
| -0.075                              | 38       | 20       | 24       | 0.25         | 18     |
| -0.025                              | 25       | 29       | 37       | 0.3          | 3      |
| 0.025                               | 47       | 35       | 42       | 0.35         | 2      |
| 0.075                               | 30       | 34       | 25       | 0.4          | 2      |
| 0.125                               | 37       | 23       | 18       | 0.45         | 0      |
| 0.175                               | 16       | 11       | 4        | 0.5          | 0      |
| 0.225                               | 8        | 7        | 4        | 0.55         | 0      |
| 0.275                               | 2        | 0        | 1        |              |        |
| 0.325                               | 0        | 0        | 0        |              |        |
| 0.375                               | 0        | 0        | 0        |              |        |

| Co-registration after arbitrary movement |          |          |          |              |        |
|------------------------------------------|----------|----------|----------|--------------|--------|
| Deviation                                | Counts_X | Counts_Y | Counts_Z | 3D_deviation | Counts |
| -0.375                                   | 0        | 0        | 1        | 0.15         | 13     |
| -0.325                                   | 0        | 1        | 0        | 0.2          | 6      |
| -0.275                                   | 0        | 4        | 1        | 0.25         | 19     |
| -0.225                                   | 5        | 7        | 0        | 0.3          | 8      |
| -0.175                                   | 11       | 8        | 2        | 0.35         | 11     |
| -0.125                                   | 9        | 11       | 7        | 0.4          | 3      |
| -0.075                                   | 15       | 14       | 6        | 0.45         | 1      |
| -0.025                                   | 8        | 3        | 7        | 0.5          | 0      |
| 0.025                                    | 8        | 4        | 6        | 0.55         | 0      |
| 0.075                                    | 4        | 6        | 15       |              |        |
| 0.125                                    | 5        | 4        | 4        |              |        |
| 0.175                                    | 1        | 4        | 6        |              |        |
| 0.225                                    | 0        | 0        | 6        |              |        |
| 0.275                                    | 0        | 0        | 4        |              |        |
