# Supplementary material for: Assessment of image co-registration accuracy for frameless gamma knife surgery
Source: PubMed Central journal article supplement (PMC5834193; doi:10.1371/journal.pone.0193809), 2018-03-02
Supplement: pone.0193809.s002.pdf [file pone.0193809.s002.pdf]

S2 Table. Frequency Counts for CT-CBCT co-registration

| Before Coregistration |          |          |          |              |        |
|-----------------------|----------|----------|----------|--------------|--------|
| Deviation             | Counts_X | Counts_Y | Counts_Z | 3D_deviation | Counts |
| -0.8                  | 0        | 0        | 0        | 0.05         | 0      |
| -0.6                  | 0        | 0        | 0        | 0.15         | 2      |
| -0.4                  | 4        | 2        | 3        | 0.25         | 4      |
| -0.2                  | 5        | 6        | 5        | 0.35         | 7      |
| 0                     | 3        | 18       | 13       | 0.45         | 4      |
| 0.2                   | 5        | 4        | 6        | 0.55         | 5      |
| 0.4                   | 6        | 0        | 3        | 0.65         | 4      |
| 0.6                   | 5        | 0        | 0        | 0.75         | 4      |
| 0.8                   | 2        | 0        | 0        | 0.85         | 0      |
|                       |          |          |          | 0.95         | 0      |

  

| Co-registration without movement |          |          |          |              |        |
|----------------------------------|----------|----------|----------|--------------|--------|
| Deviation                        | Counts_X | Counts_Y | Counts_Z | 3D_deviation | Counts |
| -0.8                             | 0        | 0        | 0        | 0.05         | 0      |
| -0.6                             | 0        | 0        | 2        | 0.15         | 3      |
| -0.4                             | 0        | 0        | 3        | 0.25         | 13     |
| -0.2                             | 3        | 4        | 6        | 0.35         | 5      |
| 0                                | 16       | 13       | 4        | 0.45         | 4      |
| 0.2                              | 10       | 13       | 9        | 0.55         | 4      |
| 0.4                              | 1        | 0        | 4        | 0.65         | 1      |
| 0.6                              | 0        | 0        | 2        | 0.75         | 0      |
| 0.8                              | 0        | 0        | 0        | 0.85         | 0      |
|                                  |          |          |          | 0.95         | 0      |

  

| Co-registration after arbitrary movement |          |          |          |              |        |
|------------------------------------------|----------|----------|----------|--------------|--------|
| Deviation                                | Counts_X | Counts_Y | Counts_Z | 3D_deviation | Counts |
| -0.8                                     | 1        | 0        | 0        | 0.05         | 4      |
| -0.6                                     | 3        | 3        | 3        | 0.15         | 6      |
| -0.4                                     | 12       | 20       | 9        | 0.25         | 8      |
| -0.2                                     | 31       | 35       | 19       | 0.35         | 11     |
| 0                                        | 24       | 21       | 15       | 0.45         | 15     |
| 0.2                                      | 9        | 2        | 8        | 0.55         | 15     |
| 0.4                                      | 2        | 1        | 22       | 0.65         | 17     |
| 0.6                                      | 0        | 0        | 6        | 0.75         | 4      |
| 0.8                                      | 0        | 0        | 0        | 0.85         | 1      |
|                                          |          |          |          | 0.95         | 1      |
